1     **Disparate patterns of thermal adaptation between life stages in temperate vs. tropical**  
2                                    *Drosophila melanogaster*

3  
4  
5  
6                                    Brent L. Lockwood\*, Tarun Gupta, and Rosemary Scavotto

7  
8                                    Department of Biology, The University of Vermont, Burlington, VT 05405

9  
10                                  \*Corresponding author: Brent.Lockwood@uvm.edu

11  
12  
13  
14    **Running headline:** *Drosophila* embryo thermal adaptation  
15

16 **Abstract**

17 Many terrestrial ectothermic species exhibit limited variation in upper thermal tolerance across  
18 latitude. However, these trends may not signify limited adaptive capacity to increase thermal  
19 tolerance in the face of climate change. Instead, thermal tolerance may be similar among  
20 populations because behavioral thermoregulation by mobile organisms or life stages may buffer  
21 natural selection for thermal tolerance. We compared thermal tolerance of adults and embryos  
22 among natural populations of *Drosophila melanogaster* from a broad range of thermal habitats  
23 around the globe to assess natural variation of thermal tolerance in mobile vs. immobile life  
24 stages. We found no variation among populations in adult thermal tolerance, but embryonic  
25 thermal tolerance was higher in tropical strains than in temperate strains. Average maximum  
26 temperature of the warmest month of the year predicted embryonic thermal tolerance in tropical  
27 but not temperate sites. We further report that embryos live closer to their upper thermal limits  
28 than adults—i.e., thermal safety margins are smaller for embryos than adults. F1 hybrid embryos  
29 from crosses between temperate and tropical populations had thermal tolerance that matched that  
30 of tropical embryos, suggesting dominance of heat-tolerant alleles. Together our findings suggest  
31 that thermal selection has led to divergence in embryonic thermal tolerance but that selection for  
32 divergent thermal tolerance may be limited in adults. Further, our results suggest that thermal  
33 traits should be measured across life stages in order to better predict adaptive limits.

34

35

36 **Key words:** *Drosophila*, embryo, heat tolerance, thermal adaptation, thermal safety margin

37 **Impact Summary**

38 Climate change may threaten the extinction of many ectothermic species, unless populations can  
39 evolutionarily adapt to rising temperatures. Natural selection should favor individuals with  
40 higher heat tolerances in hotter environments. But recent studies have found that individuals  
41 from hot and cold places often have similar heat tolerances. This pattern may indicate that the  
42 evolution of heat tolerance is constrained. If this were true, then it would have dire consequences  
43 for species persistence under novel thermal conditions.

44 An alternative explanation for lack of variation in heat tolerance is that mobile organisms  
45 don't need higher heat tolerances to survive in hotter places. The majority of studies have  
46 focused on heat tolerance of the adult life stage. Yet, adults in many species are mobile  
47 organisms that can avoid extreme heat by seeking shelter in cooler microhabitats (e.g., shaded  
48 locations). In contrast, immobile life stages (e.g., insect eggs) cannot behaviorally avoid extreme  
49 heat. Thus, mobile and immobile life stages may face different thermal selection pressures that  
50 lead to disparate patterns of thermal adaptation across life stages.

51 Here, we compared heat tolerances of fruit fly adults and eggs (*Drosophila*  
52 *melanogaster*) from populations in temperate North America and tropical locations around the  
53 globe. Consistent with previous studies, we found no differences among populations in adult heat  
54 tolerance. However, eggs from tropical flies were consistently more heat tolerant than eggs from  
55 North American flies. Further, eggs had lower heat tolerance than adults. Consequently, fly eggs  
56 in the hotter tropics may experience heat death more frequently than adult flies later in life. This  
57 may explain why patterns of divergence in heat tolerance were decoupled across life stages.  
58 These patterns indicate that thermal adaptation may be life-stage-specific and suggest that future  
59 work should characterize thermal traits across life stages to better understand the evolution of  
60 thermal limits.

61  
62

## 63 Introduction

64 Extreme temperatures, which may be encountered at the edge of a species' geographic range  
65 (Hilbish *et al.* 2010) or episodically during the hottest or coldest days of the year (Hoffmann  
66 2010; Kingsolver, Diamond & Buckley 2013; Dowd, King & Denny 2015; Buckley & Huey  
67 2016), can cause populations to experience mortality (Helmuth *et al.* 2002; Denny, Miller &  
68 Harley 2006) and ultimately lead to thermal adaptation (Lenski & Bennett 1993; Mongold,  
69 Bennett & Lenski 1999; Hangartner & Hoffmann 2015). However, recent work suggests that  
70 thermal adaptation of upper thermal limits might be evolutionarily constrained (Hoffmann,  
71 Chown & Clusella-trullas 2013; Schou *et al.* 2014; Hangartner & Hoffmann 2015; Kristensen *et*  
72 *al.* 2015; van Heerwaarden, Kellermann & Sgrò 2016), such that the evolution of increased heat  
73 tolerance might be a relatively slow process that cannot occur over short evolutionary timescales  
74 (Kellermann *et al.* 2012). If this is the case, global climate change, which has led to rapid  
75 increases in mean temperatures and the frequency of extreme thermal events (Katz & Brown  
76 1992; Meehl *et al.* 2000; Cai *et al.* 2014), may cause shifts in geographic distributions (Rank &  
77 Dahlhoff 2002; Burrows *et al.* 2011; Thomas *et al.* 2012; Sunday, Bates & Dulvy 2012) as  
78 populations may not be able to adapt fast enough to persist in hotter environments (Jezkova &  
79 Wiens 2016).

80 But thermal adaptation depends on the strength of selection (Bennett, Lenski & Mittler  
81 1992; Rudolph *et al.* 2010), and studies that focus on thermal tolerance of mobile organisms or  
82 life stages may overestimate the degree to which these organisms encounter thermal selection in  
83 nature. In other words, thermal safety margins—i.e., the difference between upper thermal limits  
84 and maximum habitat temperature—may be larger than predicted because thermal environmental  
85 heterogeneity allows mobile organisms to avoid thermal extremes via behavioral  
86 thermoregulation (Dillon *et al.* 2009; Gunderson & Leal 2012; Buckley, Ehrenberger &  
87 Angilletta 2015; Llewelyn *et al.* 2016; Munoz *et al.* 2016). To date, there have been relatively  
88 few studies that examine thermal tolerance in immobile organisms or life stages, particularly in  
89 the terrestrial realm (Angilletta *et al.* 2013; MacLean *et al.* 2016), and immobile organisms may  
90 represent ideal study systems to investigate the evolutionary potential of thermal tolerance. In  
91 support of this conjecture, broad scale patterns of thermal tolerance are more tightly correlated  
92 with habitat temperatures in marine systems than in terrestrial systems (Sunday, Bates & Dulvy  
93 2011), perhaps due to the more limited range of thermal microhabitats in the marine realm  
94 (Denny *et al.* 2011) that makes behavioral thermoregulation a less effective buffering mechanism.

95 Here we sought to compare adult and embryonic heat tolerance among populations of  
96 fruit flies, *Drosophila melanogaster*, from a broad range of thermal habitats across the world to  
97 ascertain the degree to which thermal selection has shaped the evolution of thermal tolerance  
98 across immobile vs. mobile life stages. Adult thermal tolerance has been extensively studied in  
99 natural populations of *D. melanogaster* (Bettencourt *et al.* 2002; Hoffmann & Weeks 2007;  
100 Adrion, Hahn & Cooper 2015; Buckley & Huey 2016), but to a large extent the thermal  
101 physiology of the early embryonic life stage of *D. melanogaster* has not been characterized in  
102 natural populations (Sgro *et al.* 2010; Overgaard, Kearney & Hoffmann 2014; Kristensen *et al.*  
103 2015). Studies of laboratory-bred *D. melanogaster* have shown that early embryos (0 – 2 hours  
104 post-fertilization) are more thermally sensitive than later stages (Walter, Biessmann & Petersen  
105 1990), perhaps due to the reduced heat-shock response in early embryos (Graziosi *et al.* 1980;  
106 Welte *et al.* 1993). Thus, we compared heat tolerance of adults and early stage embryos to  
107 determine whether or not differences in thermal sensitivity, as well as mobility, lead to different  
108 patterns of thermal adaptation across life stages. The thermal environment of *D. melanogaster*

109 can change rapidly ( $+18^{\circ}\text{C h}^{-1}$ ) and reach extreme values ( $> 40^{\circ}\text{C}$ ) (Feder, Blair & Figueras  
110 1997; Terblanche *et al.* 2011). Therefore, we designed our thermal stress experiments to mimic  
111 sudden (acute) changes in temperature that are characteristic of the variable thermal  
112 environments that flies experience in nature (Terblanche *et al.* 2011). We report higher  
113 embryonic thermal tolerance in tropical (hotter) vs. temperate (cooler) populations but no  
114 difference in adult thermal tolerance, and thus we demonstrate that selection for thermal  
115 tolerance likely varies across life stages. Moreover, our data suggest that there is significant  
116 adaptive variation for upper thermal tolerance in natural populations in the earliest and most  
117 thermally sensitive life stage.

118

## 119 **Materials and methods**

120

### 121 **Fly strains**

122 We obtained 20 isofemale genetic lines that were collected from temperate locations in the USA  
123 as a generous gift from B.S. Cooper and K.L. Montooth: 6 lines from Raleigh, NC (NC); 6 lines  
124 from Beasley Orchard, IN (IN); and 8 lines from East Calais, VT (VT). These lines were  
125 established by single female founders whose progeny were subsequently inbred for several  
126 generations to isogenize the genetic variability within each line, and thereby minimize the  
127 potential for lab evolution (Cooper, Hammad & Montooth 2014). These temperate North  
128 American lines have been maintained at controlled densities of 50 to 100 adults per vial since  
129 their establishment. We obtained 5 isofemale lines from the *Drosophila* Species Stock Center at  
130 the University of California, San Diego that were collected from tropical locations around the  
131 world: 1 line each from Accra, Ghana (GH); Mumbai, India (MU); Guam, USA (GU); Chiapas,  
132 Mexico (CH); and Monkey Hill, St. Kitts (SK). Stocks from the UCSD Stock Center were also  
133 established by single female founders, as described above for the North American isofemale  
134 lines, and have been maintained at controlled densities since their establishment. Geographic  
135 coordinates of collection locations are shown in Table 1 and stock numbers and collection dates  
136 of isofemale lines are provided in Supplementary Table S1. We maintained flies under common-  
137 garden conditions on cornmeal-yeast-molasses medium at  $25^{\circ}\text{C}$  on a 12:12 light cycle for at least  
138 two generations prior to measuring thermal tolerance.

139

### 140 **Adult thermal tolerance ( $LT_{50}$ ) and critical thermal maximum ( $CT_{max}$ )**

141 We assayed thermal tolerance ( $LT_{50}$ ) of adult flies by scoring the number of flies surviving after  
142 exposure to a 45-minute heat treatment across a range of temperatures, from  $36^{\circ}\text{C}$  to  $42^{\circ}\text{C}$ . 30  
143 minutes prior to heat treatment, 40 adult flies (3 to 5 day-old males and females of equal  
144 numbers) were transferred to empty glass vials (25 x 95 mm with Flugs closures, Genesee  
145 Scientific, San Diego, CA) and returned to an incubator at  $25^{\circ}\text{C}$ . Vials were then partially  
146 submerged in a water bath (1 cm below the top of the vial) and heat shocked for 45 minutes. We  
147 monitored the heat ramping rate in these heat treatments with a thermocouple (Omega  
148 Engineering, Inc., Norwalk, CT) suspended inside an adjacent empty vial. These heat treatments  
149 produced linear heat ramps that were consistent across all temperatures, with an average ( $\pm$   
150 standard deviation) rate of change of  $+0.6 \pm 0.01^{\circ}\text{C min}^{-1}$ . This rate of increase is within the  
151 range of measured rates of change in nature (Feder *et al.* 1997; Terblanche *et al.* 2011). Flies  
152 were then gently transferred to a food vial, and survival was scored after 24 h of recovery at  
153  $25^{\circ}\text{C}$ . We replicated our treatments across 3 replicate vials at each of four temperatures ( $36^{\circ}\text{C}$ ,  
154  $38^{\circ}\text{C}$ ,  $40^{\circ}\text{C}$ , and  $42^{\circ}\text{C}$ ) for each isofemale line ( $n = 40 \text{ flies} \times 3 \text{ vials} \times 4 \text{ temperatures} = 480$

155 adults per isofemale line). We scored  $LT_{50}$  as the temperature at which 50% of the adults did not  
156 recover from heat stress via a least-squares regression model of the logistic equation. We  
157 conducted these curve fitting analyses in GraphPad Prism 7 for Mac OS X (GraphPad Software,  
158 La Jolla, CA).

159 To more fully describe adult thermal tolerance among our isofemale lines, we also  
160 measured the temperature at which flies incurred a loss of motor response along a heat ramp—  
161 i.e., the critical thermal maximum ( $CT_{max}$ ). While previous studies have reported similar values  
162 of  $LT_{50}$  and  $CT_{max}$  in *D. melanogaster* (Huey, Partridge & Fowler 1991; Gilchrist, Huey &  
163 Partridge 1997), different thermal tolerance assay methods have been shown to affect the extent  
164 to which populations of *D. melanogaster* populations exhibit clinal variation in thermal tolerance  
165 (Sgro *et al.* 2010). Thus, we sought to compare both adult  $LT_{50}$  and  $CT_{max}$  among populations in  
166 order to account for potential bias that may be inherent to the assay method. 3 to 5 day-old adult  
167 male flies were individually placed into glass vials with rubber stoppers, submerged in a water  
168 bath at 25°C, and exposed to a heat ramp of +0.1°C min<sup>-1</sup>. We chose this rate of temperature  
169 increase based on previously published studies that measured  $CT_{max}$  in *Drosophila* (Chown *et al.*  
170 2009; Sgro *et al.* 2010; Kellermann *et al.* 2012) and to mimic the variable thermal environments  
171 that flies encounter in nature (Terblanche *et al.* 2011). Flies were regularly checked for  
172 responsiveness along the heat ramp by gently tapping the vial, and the temperature at which a fly  
173 lost the ability to move was recorded. We scored  $CT_{max}$  for each genotype via a least-squares  
174 regression model of the logistic equation among 10 flies per genotype and extrapolated  $CT_{max}$   
175 from the inflection points of the logistic curves. We conducted these curve fitting analyses in  
176 GraphPad Prism 7.

177

### 178 **Embryonic thermal tolerance ( $LT_{50}$ )**

179 We assayed embryonic thermal tolerance ( $LT_{50}$ ) by measuring survival (hatching success) of  
180 early stage embryos, 0 to 1 h post-fertilization, exposed to a 45-minute heat treatment across a  
181 range of temperatures, from 25°C to 42°C. We did not assay  $CT_{max}$  for embryos because  
182 embryos do not possess behavioral characteristics that would permit the assessment of thermal  
183 tolerance via loss of motor activity. We designed our heat treatments to mimic sudden increases  
184 in temperature that frequently occur in nature where the temperature of necrotic fruit can  
185 increase rapidly on hot days (Feder *et al.* 1997; Terblanche *et al.* 2011). 3 to 5 day-old adult flies  
186 were allowed to mate and lay eggs on grape juice agar plates (60 x 15 mm) for 1 h at 25°C. Egg  
187 plates were then wrapped in Parafilm, submerged in a water bath, and heat shocked for 45  
188 minutes. We monitored the heat ramping rate in these treatments via a thermocouple (Omega  
189 Engineering, Inc.) placed at the surface of the egg plate media. These heat treatments produced  
190 heat ramps that were similar to those of the adult  $LT_{50}$  assays, with an average ( $\pm$  standard  
191 deviation) rate of temperature change of  $+0.57 \pm 0.3^\circ\text{C min}^{-1}$ . The higher variance in ramping  
192 rates among the egg heat treatments, compared to the relatively low variance among the adult  
193 assays, was likely due to the presence of the agar in the egg plates, which varied in thickness  
194 between 5 and 10 mm. These rates of increase are within the range of measured rates of change  
195 of necrotic fruit in nature (Feder *et al.* 1997).

196 Following heat shock, 20 eggs were transferred on a piece of grape juice agar to fresh  
197 food vials and placed at 25°C. Hatching success was scored as the proportion of larvae that  
198 successfully hatched by 48 h. We conducted 4 to 6 replicate treatments at each of 9 temperatures  
199 (25°C, 28°C, 30°C, 32°C, 34°C, 36°C, 38°C, 40°C, and 42°C) for each isofemale line (n = 20  
200 embryos x 4 replicates x 9 temperatures = 720 embryos per isofemale line). We used these data

201 to calculate the lethal temperature at which 50% of the embryos failed to hatch ( $LT_{50}$ ) via a least-  
202 squares regression model of the logistic equation. In our logistic model, we allowed the y-  
203 intercept to vary between 0 and 1 and extrapolated the  $LT_{50}$  from the inflection point of the  
204 logistic curve fit. This approach allowed us to infer thermal tolerance independently from other  
205 confounding factors that may influence the measurement of hatching success, such as the  
206 presence of unfertilized eggs. We conducted these curve fitting analyses in GraphPad Prism 7.

207

### 208 **Statistical comparisons of thermal tolerance, thermal safety margins, and maternal effects**

209 We compared adult ( $LT_{50}$ ) and embryonic ( $LT_{50}$ ) thermal tolerances among temperate sites (VT,  
210 IN, and NC) and all tropical sites pooled together (CH, SK, GH, MU, and GU) with ANOVA.  
211 This ANOVA design allowed us to (1) assess variation within and among North American  
212 populations to test for clinal variation in North America and (2) compare variation within and  
213 between North America vs. the tropics to test for consistent differences between temperate and  
214 tropical regions. Pairwise differences were assessed with Tukey's multiple comparison post-hoc  
215 test.

216 We calculated thermal safety margins as the difference between thermal tolerance (adult  
217  $LT_{50}$  or embryo  $LT_{50}$ ) and maximum temperature of the warmest month ( $T_{max}$ ) at each site. We  
218 downloaded  $T_{max}$  estimates from the WorldClim database (Hijmans *et al.* 2005)  
219 ([www.worldclim.org](http://www.worldclim.org)) that corresponded to the GPS coordinates of the collection sites of each  
220 population (see Table 1). These  $T_{max}$  estimates are based on climate data from the years 1950 to  
221 2000. Fine-scale spatial temperature data are not available for these collection sites, but while  
222  $T_{max}$  may not perfectly match the thermal environment experienced by flies, variation in  $T_{max}$   
223 should reflect relative differences in the thermal environments among locations. In addition,  
224 previous studies have shown  $T_{max}$  to be a significant predictor of upper thermal limits in  
225 *Drosophila* (Kellermann *et al.* 2012). We assessed the main effects of region (temperate vs.  
226 tropical), life stage (adult vs. embryo), and their interaction on thermal safety margins via a 2-  
227 way ANOVA. Least-squares linear regression was used to assess the relationship between  
228 thermal tolerance and  $T_{max}$ . ANCOVA was used to assess the difference in slopes of regression  
229 lines fit to data from temperate vs. tropical sites.

230 We tested for the potential role of maternal effects in conferring heat tolerance to tropical  
231 embryos by conducting reciprocal crosses between the two parental strains that had the highest  
232 and lowest  $LT_{50}$ , Chiapas, MX (CH) and Vermont, USA strain #12 (VT-12), respectively, and  
233 measured thermal tolerance of F1 progeny. At this stage of development (0-1 h-old), early  
234 embryos have inactive gene transcription and thus their physiology is predicted to depend on  
235 maternal factors, such as mRNAs and proteins, loaded into eggs (Tadros & Lipshitz 2009; Blythe  
236 & Wieschaus 2015). We used logistic models to fit the hatching success data, as described above,  
237 and compared  $LT_{50}$ s of the parental strains and their F1 progeny by an extra sum-of-squares F-  
238 test of the extrapolated  $LT_{50}$ s. We conducted these analyses in GraphPad Prism 7.

239

## 240 **Results**

241

### 242 **Thermal tolerance and thermal safety margins across life stages**

243 We found no difference in adult thermal tolerance among all sites (Figs. 1A and 1B; ANOVA,  
244  $F_{3,20} = 0.3134$ ,  $P = 0.8155$ ), with an overall mean  $LT_{50}$  ( $\pm$  95% C.I.) of  $39.84 \pm 0.12^{\circ}\text{C}$ . We also  
245 did not observe any difference among collection sites in adult thermal tolerance as measured by  
246  $CT_{max}$  (Fig. S1; ANOVA,  $F_{3,9} = 2.378$ ,  $P = 0.1375$ ). Adult  $CT_{max}$  values were slightly lower than

247 LT<sub>50</sub> values, with an overall mean ( $\pm$  95% C.I.) of  $38.77 \pm 0.52^\circ\text{C}$  (Fig. S2). This lower value of  
248 CT<sub>max</sub> may have been due to multiple factors, including the slower ramping rate of the CT<sub>max</sub>  
249 experiments, the thermal sensitivity of locomotor activity, or the fact that we assayed CT<sub>max</sub> only  
250 for males whereas females were included in our assay of LT<sub>50</sub>.

251 Embryonic thermal tolerance (LT<sub>50</sub>) did not differ among the three temperate sites but  
252 was significantly higher in tropical vs. temperate embryos (Figs. 1C and 1D; ANOVA,  $F_{3,20} =$   
253 10.16,  $P = 0.0003$ ; Tukey's test, VT vs. IN,  $q = 2.428$ ,  $P = 0.3416$ , VT vs. NC,  $q = 0.4268$ ,  $P =$   
254 0.9902, IN vs. NC,  $q = 2.666$ ,  $P = 0.2656$ , tropical vs. VT,  $q = 6.909$ ,  $P = 0.0005$ , tropical vs. IN,  
255  $q = 4.04$ ,  $P = 0.0444$ , tropical vs. NC,  $q = 4.04$ ,  $P = 0.0005$ ). Overall, tropical embryos were  
256 more heat tolerant; the average LT<sub>50</sub> was approximately  $1^\circ\text{C}$  higher in tropical embryos ( $35.8 \pm$   
257  $0.45^\circ\text{C}$ ) than in temperate embryos ( $34.88 \pm 0.18^\circ\text{C}$ ). There was no significant relationship  
258 between adult LT<sub>50</sub> and embryo LT<sub>50</sub> for either temperate (Fig. S2; Least-squares linear  
259 regression,  $R^2 = 0.015$ ,  $y = -0.1973x + 42.73$ ) or tropical lines (Fig. S2; Least-squares linear  
260 regression,  $R^2 = 0.09$ ,  $y = 0.2664x + 25.15$ ).

261 Thermal safety margins—i.e., the difference between thermal tolerance (CT<sub>max</sub> or LT<sub>50</sub>)  
262 and maximum habitat temperature (T<sub>max</sub>)—were consistently smaller for embryos than adults.  
263 This pattern was consistent across regions (temperate and tropical) (Fig. 2; ANOVA, main effect  
264 of life stage,  $F_{1,45} = 26.19$ ,  $P < 0.0001$ ), however thermal safety margins were smaller in both life  
265 stages for tropical than for temperate sites (Fig. 2; ANOVA, main effect of region,  $F_{1,45} = 10.58$ ,  
266  $P = 0.0027$ , life stage x region interaction,  $F_{1,45} = 0.1745$ ,  $P = 0.6782$ ).

267

### 268 **Maximum habitat temperature and thermal tolerance**

269 Maximum temperature of the warmest month (i.e., maximum habitat temperature or T<sub>max</sub>)  
270 spanned a range of  $8.4^\circ\text{C}$  among all sites, from  $25.7^\circ\text{C}$  in Vermont, USA (VT) to  $34.1^\circ\text{C}$  in  
271 Chiapas, MX (CH) (Table 1). Previous studies have shown T<sub>max</sub> to be positively correlated with  
272 adult heat tolerance (CT<sub>max</sub>) among many species of *Drosophila* (Kellermann *et al.* 2012);  
273 however, our populations of *D. melanogaster* showed no significant relationship between adult  
274 heat tolerance (LT<sub>50</sub>) and T<sub>max</sub> in either temperate (Fig. S3; Least-squares linear regression,  $R^2 =$   
275 0.004,  $y = -0.0005x + 39.83$ ) or tropical regions (Fig. S3; Least-squares linear regression,  $R^2 =$   
276 0.14,  $y = 0.098x + 36.82$ ). The embryonic life stage exhibited a different pattern from the adults,  
277 and the relationship between embryonic heat tolerance and T<sub>max</sub> was distinct between temperate  
278 and tropical regions (Fig. 3; ANCOVA,  $F_{1,4} = 10.26$ ,  $P = 0.0328$ ). Among temperate populations  
279 there was a  $6^\circ\text{C}$  range in T<sub>max</sub>, but this produced no correlated response in the thermal tolerance  
280 of embryos (Fig. 3; Least-squares regression,  $R^2 = 0.0015$ ,  $P = 0.9751$ ,  $y = 0.00282x + 34.82$ ).  
281 But among tropical populations, the approximate  $4^\circ\text{C}$  range in T<sub>max</sub> corresponded to a positive  
282 relationship between embryonic thermal tolerance and T<sub>max</sub> (Fig. 3; Least-squares regression,  $R^2$   
283  $= 0.9478$ ,  $P = 0.0051$ ,  $y = 0.2199x + 28.75$ ).

284

### 285 **Embryonic thermal tolerance in F1 progeny from Chiapas x Vermont**

286 Offspring from reciprocal genetic crosses between the most heat tolerant tropical genotype (CH)  
287 and the least heat tolerant temperate genotype (VT-12) had thermal tolerances that closely  
288 resembled that of the heat tolerant CH genotype, regardless of the direction of the cross (Fig. 4),  
289 suggesting dominance of heat tolerant alleles and no significant maternal effect. Embryonic  
290 LT<sub>50</sub>s of F1 progeny of both crosses (CH<sub>♀</sub> x VT<sub>♂</sub> =  $35.83^\circ\text{C}$  and VT<sub>♀</sub> x CH<sub>♂</sub> =  $35.80^\circ\text{C}$ ) were  
291 statistically indistinguishable from the LT<sub>50</sub> of CH ( $36.24^\circ\text{C}$ ) but significantly higher than the



292 LT<sub>50</sub> of VT-12 (34.23°C; Fig. 4; Logistic model, Extra sum-of-squares F-test on lower LT<sub>50</sub> of  
293 VT-12,  $F_{3,166} = 6.695$ ).

294

## 295 Discussion

296

297 Despite the potential for thermal adaptation across the broad range of thermal habitats  
298 represented in this study, our data suggest that natural selection on thermal tolerance does not act  
299 equally across life stages in *D. melanogaster*. Rather, we provide evidence of adaptive variation  
300 in upper thermal limits in the thermally sensitive and immobile embryonic life stage but not in  
301 the more thermally tolerant and mobile adult stage. This is perhaps not surprising, given that  
302 lower thermal tolerance in early embryos translates into smaller thermal safety margins. Thus,  
303 we predict that embryos encounter lethal temperatures more frequently than adults, particularly  
304 because embryos lack the ability to behaviorally avoid thermally stressful conditions, and this  
305 likely drives divergence in embryonic thermal tolerance between temperate North American and  
306 tropical populations.

307 Recent estimates of divergence in adult thermal tolerance among populations of *D.*  
308 *melanogaster* have brought into question the degree of adaptive potential in upper thermal limits  
309 in this species, as comparisons of populations across latitude have yielded mixed results  
310 depending on assay methods (Sgro *et al.* 2010) and the laboratory in which thermal tolerance  
311 was measured (Hoffmann, Anderson & Hallas 2002; Hoffmann 2010; Buckley & Huey 2016).  
312 Our estimates of *D. melanogaster* adult male CT<sub>max</sub> are consistent with previous reports  
313 (Gilchrist *et al.* 1997; Chown *et al.* 2009; Kellermann *et al.* 2012), and while we report novel  
314 findings on the adaptation of embryonic thermal tolerance, our results are not unprecedented.  
315 Coyne *et al.* (Coyne, Bundgaard & Prout 1983) reported a similar discrepancy in thermal  
316 adaptation between mobile and immobile life stages among populations of *Drosophila*  
317 *pseudoobscura*—pupal thermal tolerance, but not adult thermal tolerance, was higher in  
318 populations from warmer locations. The interplay of population genetic factors in natural  
319 populations of *D. melanogaster* suggest that this species harbors a high level of genetic diversity  
320 (Karasov, Messer & Petrov 2010) and that natural selection has led to allelic divergence among  
321 populations across the genome (Hoffmann & Weeks 2007; Fabian *et al.* 2012; Adrion *et al.*  
322 2015). In light of these trends in population genomics, and the adaptive variation in embryonic  
323 thermal tolerance presented in this study, it seems probable that there is significant natural  
324 variation of upper thermal limits in *D. melanogaster* but that this variation may only be revealed  
325 in the embryonic and other immobile life stages.

326 It is important to note that laboratory selection experiments in *D. melanogaster*,  
327 *Escherichia coli*, and marine copepods (*Tigriopus californicus*) that imposed strong selection on  
328 thermal tolerance reported significant potential for adaptation of upper thermal limits, but the  
329 response to selection eventually plateaued after many generations, presumably when standing  
330 genetic diversity had been exhausted (Huey *et al.* 1991; Gilchrist *et al.* 1997; Gilchrist & Huey  
331 1999; Rudolph *et al.* 2010; Kelly, Sanford & Grosberg 2012; Hangartner & Hoffmann 2015).  
332 Thus, there may likely be potential for adaptation of upper thermal limits, and in natural  
333 populations greater levels of standing genetic variation may be able to sustain adaptive responses  
334 to thermal selection.

335 This study characterizes thermal tolerance among populations that span a large portion of  
336 the *D. melanogaster* biogeographic range in the northern hemisphere, and while we present  
337 evidence of adaptation of embryonic thermal tolerance between temperate and tropical regions,

338 the patterns of thermal adaptation are not consistent within each region. Tropical embryos  
339 sampled from locations with higher maximum habitat temperature ( $T_{max}$ ) showed higher thermal  
340 tolerances, yet temperate populations did not follow this trend. Why were there no observed  
341 differences in embryonic thermal tolerance among temperate populations when temperate sites  
342 spanned a broader range of thermal habitats than tropical populations? It is possible that gene  
343 flow between Vermont, Indiana, and North Carolina overwhelms local adaptation, but recent  
344 studies show evidence of adaptive divergence among *D. melanogaster* populations in eastern  
345 North America (Fabian *et al.* 2012; Bergland *et al.* 2016; Machado *et al.* 2016). Therefore, a  
346 more likely explanation is that seasonal fluctuations in the activity of temperate populations  
347 (Cogni *et al.* 2014), may limit the frequency at which temperate embryos encounter thermal  
348 selection. In addition, spatial and temporal microclimatic variability in temperate sites may  
349 provide more choices for females to lay their eggs at permissive temperatures (Allemand &  
350 David 1976; Dahlgaard, Hasson & Loeschcke 2001; Huey & Pascual 2009; Dillon *et al.* 2009).

351 We note that our data constitute thermal tolerances of multiple isofemale lines from each  
352 of the three temperate sites and one isofemale line from each of the five tropical sites. While we  
353 have not captured the full range of genetic variation within each tropical site, our data represent a  
354 broad sample of genetic diversity among tropical sites around the globe. Notably, the variance in  
355 thermal tolerance among all tropical genotypes was similar to the variance both within and  
356 among North American populations. However, there was no overlap in the confidence intervals  
357 of embryonic thermal tolerance between North American and tropical genotypes, whereas the  
358 confidence intervals of adult thermal tolerance were completely overlapping. Given that the  
359 tropical genotypes originated from geographically isolated locations (Table 1), we believe that  
360 these data reflect (1) selection for the maintenance of higher embryonic heat tolerance in the  
361 tropics and/or (2) convergent patterns of thermal adaptation across tropical populations. The  
362 positive correlation of embryonic thermal tolerance with maximum habitat temperature at  
363 tropical sites is a result that warrants further investigation. It remains to be determined the extent  
364 to which this pattern will hold when a greater sample of genetic diversity is surveyed within each  
365 topical population.

366 While thermal tolerance has been shown to be a complex quantitative trait in the adult  
367 and larval stages of *D. melanogaster* (Morgan & Mackay 2006; Sambucetti *et al.* 2013), the  
368 genetic basis of variation in embryonic thermal tolerance remains unresolved. We note that our  
369 reciprocal crossing design was not meant to be a full characterization of the genetic architecture  
370 of natural variation in embryonic thermal tolerance. Such an analysis would require a diallel  
371 crossing design among multiple isofemale lines in each population (Griffing 1956). Rather, our  
372 analysis was meant to test the potential role of maternal effects in our two most divergent  
373 genotypes (i.e. Chiapas [CH] vs. Vermont-12 [VT-12]). Because zygotic gene expression is  
374 inactive in early *D. melanogaster* embryos (0 – 1 h post-fertilization) (Tadros & Lipshitz 2009;  
375 Blythe & Wieschaus 2015), we predicted embryonic thermal tolerance to be determined by  
376 maternal factors, such as mRNAs and proteins, that are loaded into eggs. Contrary to this  
377 prediction, embryonic thermal tolerance in F1 progeny of crosses between Chiapas and  
378 Vermont-12 lines matched that of the Chiapas strain regardless of maternal genotype. This result  
379 suggests dominance of heat-tolerant alleles and not maternal effects as the basis of embryonic  
380 heat tolerance. Further, this suggests that either (1) the zygotic genome is being activated in  
381 embryos earlier than expected in response to heat shock (Graziosi *et al.* 1980), which would  
382 reveal adaptive variation in zygotic gene expression, or (2) that the effect is mediated at the level  
383 of the chromosomes, perhaps due to thermally-induced DNA damage (Yao & Somero 2012) that

384 differentially affects different genotypes (Svetec *et al.* 2016). Either way, the unknown genetic  
385 basis of embryonic thermal tolerance warrants future study.

386

### 387 **Author's Contributions**

388 BL conceived the ideas and designed the methodology; BL, TG, and RS collected the data; BL  
389 analyzed the data; BL wrote the manuscript. All authors gave final approval for publication.

390

### 391 **Acknowledgements**

392 We thank Kristi Montooth, Brandon Cooper, Cole Julick and the UC San Diego Drosophila  
393 Species Stock Center for providing fly stocks. We thank Sarah Howe for managing fly socks.

394 We thank Emily Mikucki and Sarah Howe for their assistance in recording heat ramp rates. We  
395 thank Melissa Pespeni, Brandon Cooper, Kristi Montooth, Emily Mikucki, and two anonymous  
396 reviewers for helpful comments on this manuscript. This work was funded by the University of  
397 Vermont. The authors have no competing interests.

398

### 399 **Data Accessibility**

400 Fly stock information is included in Table S1, including geographical coordinates of sampling  
401 locations, stock numbers, and thermal tolerance data.

402

403 **References**

- 404 Adrion, J.R., Hahn, M.W. & Cooper, B.S. (2015) Revisiting classic clines in *Drosophila*  
405 *melanogaster* in the age of genomics. *Trends in Genetics*, **31**, 434–444.
- 406 Allemand, R. & David, J.R. (1976) The circadian rhythm of oviposition in *Drosophila*  
407 *melanogaster*: a genetic latitudinal cline in wild populations. *Experientia*, **32**, 1403–1404.
- 408 Angilletta, M.J., Zelic, M.H., Adrian, G.J., Hurliman, a. M. & Smith, C.D. (2013) Heat  
409 tolerance during embryonic development has not diverged among populations of a  
410 widespread species (*Sceloporus undulatus*). *Conservation Physiology*, **1**, cot018.
- 411 Bennett, A.F., Lenski, R.E. & Mittler, J.E. (1992) Evolutionary Adaptation to Temperature. I.  
412 Fitness Responses of *Escherichia coli* to Changes in its Thermal Environment. *Evolution*,  
413 **46**, 16–30.
- 414 Bergland, A.O., Tobler, R., Gonzalez, J., Schmidt, P. & Petrov, D. (2016) Secondary contact and  
415 local adaptation contribute to genome-wide patterns of clinal variation in *Drosophila*  
416 *melanogaster*. *Molecular Ecology*, **25**, 1157–1174.
- 417 Bettencourt, B.R., Kim, I., Hoffmann, A.A. & Feder, M.E. (2002) Response to Natural and  
418 Laboratory Selection at the *Drosophila* HSP70 Genes. *Evolution*, **56**, 1796–1801.
- 419 Blythe, S.A. & Wieschaus, E.F. (2015) Coordinating Cell Cycle Remodeling with  
420 Transcriptional Activation at the *Drosophila* MBT. *Current Topics in Developmental*  
421 *Biology*, **113**, 113–148.
- 422 Buckley, L.B., Ehrenberger, J.C. & Angilletta, M.J. (2015) Thermoregulatory behaviour limits  
423 local adaptation of thermal niches and confers sensitivity to climate change. *Functional*  
424 *Ecology*, **29**, 1038–1047.
- 425 Buckley, L.B. & Huey, R.B. (2016) How Extreme Temperatures Impact Organisms and the  
426 Evolution of their Thermal Tolerance. *Integrative and Comparative Biology*, **56**, 98–109.
- 427 Burrows, M.T., Schoeman, D.S., Buckley, L.B., Moore, P., Poloczanska, E.S., Brander, K.M.,  
428 Brown, C., Bruno, J.F., Duarte, C.M., Halpern, B.S., Holding, J., Kappel, C. V, Kiessling,  
429 W., O’Connor, M.I., Pandolfi, J.M., Parmesan, C., Schwing, F.B., Sydeman, W.J. &  
430 Richardson, A.J. (2011) The pace of shifting climate in marine and terrestrial ecosystems.  
431 *Science*, **334**, 652–655.
- 432 Cai, W., Borlace, S., Lengaigne, M., van Rensch, P., Collins, M., Vecchi, G., Timmermann, A.,  
433 Santoso, A., McPhaden, M.J., Wu, L., England, M.H., Wang, G., Guilyardi, E. & Jin, F.-F.  
434 (2014) Increasing frequency of extreme El Niño events due to greenhouse warming. *Nature*  
435 *Climate Change*, **5**, 1–6.
- 436 Chown, S.L., Jumbam, K.R., Sørensen, J.G. & Terblanche, J.S. (2009) Phenotypic variance,  
437 plasticity and heritability estimates of critical thermal limits depend on methodological  
438 context. *Functional Ecology*, **23**, 133–140.
- 439 Cogni, R., Kuczynski, C., Koury, S., Lavington, E., Behrman, E.L., O’Brien, K.R., Schmidt, P.S.  
440 & Eanes, W.F. (2014) The Intensity of Selection Acting on the Couch Potato Gene -  
441 Spatial-Temporal Variation in a Diapause Cline. *Evolution*, **68**, 538–548.
- 442 Cooper, B.S., Hammad, L. a & Montooth, K.L. (2014) Thermal adaptation of cellular  
443 membranes in natural populations of *Drosophila melanogaster*. *Functional Ecology*, **28**,  
444 886–894.
- 445 Coyne, J. a., Bundgaard, J. & Prout, T. (1983) Geographic Variation of Tolerance to  
446 Environmental Stress in *Drosophila pseudoobscura*. *The American Naturalist*, **122**, 474-488.
- 447 Dahlggaard, J., Hasson, E. & Loeschke, V. (2001) Behavioral differentiation in oviposition  
448 activity in *Drosophila buzzatii* from highland and lowland populations in Argentina:

- 449 plasticity or thermal adaptation? *Evolution*, **55**, 738–47.
- 450 Denny, M.W., Dowd, W.W., Bilir, L. & Mach, K.J. (2011) Spreading the risk: Small-scale body  
451 temperature variation among intertidal organisms and its implications for species  
452 persistence. *Journal of Experimental Marine Biology and Ecology*, **400**, 175–190.
- 453 Denny, M.W., Miller, L.P. & Harley, C.D.G. (2006) Thermal stress on intertidal limpets: long-  
454 term hindcasts and lethal limits. *The Journal of Experimental Biology*, **209**, 2420–2431.
- 455 Dillon, M.E., Wang, G., Garrity, P. a & Huey, R.B. (2009) Review: Thermal preference in  
456 *Drosophila*. *Journal of thermal biology*, **34**, 109–119.
- 457 Dowd, W.W., King, F.A. & Denny, M.W. (2015) Thermal variation, thermal extremes and the  
458 physiological performance of individuals. *Journal of Experimental Biology*, **218**, 1956–  
459 1967.
- 460 Fabian, D.K., Kapun, M., Nolte, V., Kofler, R., Schmidt, P.S., Schlötterer, C. & Flatt, T. (2012)  
461 Genome-wide patterns of latitudinal differentiation among populations of *Drosophila*  
462 *melanogaster* from North America. *Molecular Ecology*, **21**, 4748–4769.
- 463 Feder, M.E., Blair, N. & Figueras, H. (1997) Natural thermal stress and heat shock protein  
464 expression in *Drosophila* larvae and pupae. *Functional Ecology*, **11**, 90–100.
- 465 Gilchrist, G.W. & Huey, R.B. (1999) The direct response of *Drosophila melanogaster* to  
466 selection on knockdown temperature. *Heredity*, **83 ( Pt 1)**, 15–29.
- 467 Gilchrist, G.W., Huey, R. & Partridge, L. (1997) Thermal Sensitivity of *Drosophila*  
468 *melanogaster*: Evolutionary Responses of Adults and Eggs to Laboratory Natural Selection  
469 at Different Temperatures. *Physiological Zoology*, **70**, 403–414.
- 470 Graziosi, G., Micali, F., Marzari, R., de Cristini, F. & Savoini, A. (1980) Variability of response  
471 of early *Drosophila* embryos to heat shock. *The Journal of Experimental Zoology*, **214**,  
472 141–145.
- 473 Griffing, B. (1956) Concept of General and Specific Combining Ability in Relation to Diallel  
474 Crossing Systems. *Australian Journal of Biological Sciences*, **9**, 463–493.
- 475 Gunderson, A.R. & Leal, M. (2012) Geographic variation in vulnerability to climate warming in  
476 a tropical Caribbean lizard. *Functional Ecology*, **26**, 783–793.
- 477 Hangartner, S. & Hoffmann, A.A. (2015) Evolutionary potential of multiple measures of upper  
478 thermal tolerance in *Drosophila melanogaster*. *Functional Ecology*, **30**, 442–452.
- 479 van Heerwaarden, B., Kellermann, V. & Sgrò, C.M. (2016) Limited scope for plasticity to  
480 increase upper thermal limits. *Functional Ecology*, **30**, 1947–1956.
- 481 Helmuth, B., Harley, C.D.G., Halpin, P.M., O'Donnell, M., Hofmann, G.E. & Blanchette, C.A.  
482 (2002) Climate change and latitudinal patterns of intertidal thermal stress. *Science*, **298**,  
483 1015–1017.
- 484 Hijmans, R.J., Cameron, S.E., Parra, J.L., Jones, P.G. & Jarvis, A. (2005) Very high resolution  
485 interpolated climate surfaces for global land areas. *International Journal of Climatology*, **25**,  
486 1965–1978.
- 487 Hilbish, T.J., Brannock, P.M., Jones, K.R., Smith, A.B., Bullock, B.N., Wethey, D.S. & Smith,  
488 AB. (2010) Historical changes in the distributions of invasive and endemic marine  
489 invertebrates are contrary to global warming predictions: the effects of decadal climate  
490 oscillations. *Journal of Biogeography*, **37**, 423–431.
- 491 Hoffmann, A.A. (2010) Physiological climatic limits in *Drosophila*: patterns and implications.  
492 *Journal of Experimental Biology*, **213**, 870–880.
- 493 Hoffmann, A.A., Anderson, A. & Hallas, R. (2002) Opposing clines for high and low  
494 temperature resistance in *Drosophila melanogaster*. *Ecology Letters*, **5**, 614–618.

- 495 Hoffmann, A.A., Chown, S.L. & Clusella-trullas, S. (2013) Upper thermal limits in terrestrial  
496 ectotherms: how constrained are they? *Functional Ecology*, **27**, 934–949.
- 497 Hoffmann, A.A. & Weeks, A.R. (2007) Climatic selection on genes and traits after a 100 year-  
498 old invasion: A critical look at the temperate-tropical clines in *Drosophila melanogaster*  
499 from eastern Australia. *Genetica*, **129**, 133–147.
- 500 Huey, R.B., Partridge, L. & Fowler, K. (1991) Thermal sensitivity of *Drosophila melanogaster*  
501 responds rapidly to laboratory natural selection. *Evolution*, **45**, 751–756.
- 502 Huey, R.B. & Pascual, M. (2009) Partial thermoregulatory compensation by a rapidly evolving  
503 invasive species along a latitudinal cline. *Ecology*, **90**, 1715–1720.
- 504 Jezkova, T. & Wiens, J.J. (2016) Rates of change in climatic niches in plant and animal  
505 populations are much slower than projected climate change. *Proceedings of the Royal*  
506 *Society B: Biological Sciences*, **283**, 20162104.
- 507 Karasov, T., Messer, P.W. & Petrov, D. a. (2010) Evidence that adaptation in *Drosophila* is not  
508 limited by mutation at single sites. *PLoS genetics*, **6**, e1000924.
- 509 Katz, R.W. & Brown, B.G. (1992) Extreme events in a changing climate: Variability is more  
510 important than averages. *Climatic Change*, **21**, 289–302.
- 511 Kellermann, V., Overgaard, J., Hoffmann, A. a, Fløjgaard, C., Svenning, J.-C. & Loeschcke, V.  
512 (2012) Upper thermal limits of *Drosophila* are linked to species distributions and strongly  
513 constrained phylogenetically. *Proceedings of the National Academy of Sciences of the*  
514 *United States of America*, **109**, 16228–16233.
- 515 Kelly, M.W., Sanford, E. & Grosberg, R.K. (2012) Limited potential for adaptation to climate  
516 change in a broadly distributed marine crustacean. *Proceedings of the Royal Society B-*  
517 *Biological Sciences*, **279**, 349–356.
- 518 Kingsolver, J.G., Diamond, S.E. & Buckley, L.B. (2013) Heat stress and the fitness  
519 consequences of climate change for terrestrial ectotherms. *Functional Ecology*, **27**, 1415–  
520 1423.
- 521 Kristensen, T.N., Overgaard, J., Lassen, J., Hoffmann, A. a & Sgrò, C. (2015) Low evolutionary  
522 potential for egg-to-adult viability in *Drosophila melanogaster* at high temperatures.  
523 *Evolution*, **69**, 803–814.
- 524 Lenski, R.E. & Bennett, A.F. (1993) Evolutionary Response of *Escherichia coli* to Thermal  
525 Stress. *The American Naturalist*, **142**, S47–S64.
- 526 Llewelyn, J., Macdonald, S., Hatcher, A., Moritz, C. & Phillips, B.L. (2016) Thermoregulatory  
527 behaviour explains countergradient variation in the upper thermal limit of a rainforest skink.  
528 *Oikos*, **126**, 748–757.
- 529 Machado, H.E., Bergland, A.O., O'Brien, K.R., Behrman, E.L., Schmidt, P.S. & Petrov, D.A.  
530 (2016) Comparative population genomics of latitudinal variation in *D. simulans* and *D.*  
531 *melanogaster*. *Molecular Ecology*, **25**, 723-740.
- 532 MacLean, H.J., Higgins, J.K., Buckley, L.B. & Kingsolver, J.G. (2016) Geographic divergence  
533 in upper thermal limits across insect life stages: does behavior matter? *Oecologia*, **181**, 107-  
534 114.
- 535 Meehl, G. a., Zwiers, F., Evans, J., Knutson, T., Mearns, L. & Whetton, P. (2000) Trends in  
536 extreme weather and climate events: Issues related to modeling extremes in projections of  
537 future climate change. *Bulletin of the American Meteorological Society*, **81**, 427–436.
- 538 Mongold, J.A., Bennett, A.F. & Lenski, R.E. (1999) Evolutionary adaptation to temperature. VII.  
539 Extension of the upper thermal limit of *Escherichia coli*. *Evolution*, **53**, 386–394.
- 540 Morgan, T. & Mackay, T. (2006) Quantitative trait loci for thermotolerance phenotypes in

- 541 *Drosophila melanogaster*. *Heredity*, **96**, 232–242.
- 542 Munoz, M.M., Langham, G.M., Brandley, M.C., Rosauer, D.F., Williams, S.E. & Moritz, C.
- 543 (2016) Basking behavior predicts the evolution of heat tolerance in Australian rainforest
- 544 lizards. *Evolution*, **70**, 2537–2549.
- 545 Overgaard, J., Kearney, M.R. & Hoffmann, A.A. (2014) Sensitivity to thermal extremes in
- 546 Australian *Drosophila* implies similar impacts of climate change on the distribution of
- 547 widespread and tropical species. *Global Change Biology*, **20**, 1738–1750.
- 548 Rank, N.E. & Dahlhoff, E.P. (2002) Allele frequency shifts in response to climate change and
- 549 physiological consequences of allozyme variation in a montane insect. *Evolution*, **56**, 2278–
- 550 2289.
- 551 Rudolph, B., Gebendorfer, K.M., Buchner, J. & Winter, J. (2010) Evolution of *Escherichia coli*
- 552 for Growth at High Temperatures. *Journal of Biological Chemistry*, **285**, 19029–19034.
- 553 Sambucetti, P., Scannapieco, a C., Loeschcke, V. & Norry, F.M. (2013) Heat-stress survival in
- 554 the pre-adult stage of the life cycle in an intercontinental set of recombinant inbred lines of
- 555 *Drosophila melanogaster*. *The Journal of Experimental Biology*, **216**, 2953–9.
- 556 Schou, M.F., Kristensen, T.N., Kellermann, V., Schlotterer, C. & Loeschcke, V. (2014) A
- 557 *Drosophila* laboratory evolution experiment points to low evolutionary potential under
- 558 increased temperatures likely to be experienced in the future. *Journal of Evolutionary*
- 559 *Biology*, **27**, 1859–1868.
- 560 Sgro, C.M., Overgaard, J., Kristensen, T.N., Mitchell, K.A., Cockerell, F.E. & Hoffmann, A.A.
- 561 (2010) A comprehensive assessment of geographic variation in heat tolerance and
- 562 hardening capacity in populations of *Drosophila melanogaster* from Eastern Australia.
- 563 *Journal of Evolutionary Biology*, **23**, 2484–2493.
- 564 Sunday, J.M., Bates, A.E. & Dulvy, N.K. (2011) Global analysis of thermal tolerance and
- 565 latitude in ectotherms. *Proceedings of the Royal Society B*, **278**, 1823–1830.
- 566 Sunday, J.M., Bates, A.E. & Dulvy, N.K. (2012) Thermal tolerance and the global redistribution
- 567 of animals. *Nature Climate Change*, **2**, 686–690.
- 568 Svetec, N., Cridland, J.M., Zhao, L. & Begun, D.J. (2016) The Adaptive Significance of Natural
- 569 Genetic Variation in the DNA Damage Response of *Drosophila melanogaster*. *PLOS*
- 570 *Genetics*, **12**, e1005869.
- 571 Tadros, W. & Lipshitz, H.D. (2009) The maternal-to-zygotic transition: a play in two acts.
- 572 *Development*, **136**, 3033–42.
- 573 Terblanche, J.S., Hoffmann, A.A., Mitchell, K.A., Rako, L., le Roux, P.C. & Chown, S.L. (2011)
- 574 Ecologically relevant measures of tolerance to potentially lethal temperatures. *Journal of*
- 575 *Experimental Biology*, **214**, 3713–3725.
- 576 Thomas, M.K., Kremer, C.T., Klausmeier, C. a & Litchman, E. (2012) A global pattern of
- 577 thermal adaptation in marine phytoplankton. *Science*, **338**, 1085–1088.
- 578 Walter, M.F., Biessmann, H. & Petersen, N.S. (1990) Heat shock causes the collapse of the
- 579 intermediate filament cytoskeleton in *Drosophila* embryos. *Developmental Genetics*, **11**,
- 580 270–279.
- 581 Welte, M.A., Tetrault, J.M., Dellavalle, R.I.P. & Lindquist, S.L. (1993) A new method for
- 582 manipulating transgenes: engineering heat tolerance in a complex, multicellular organism.
- 583 *Current Biology*, **3**, 842–853.
- 584 Yao, C.-L. & Somero, G.N. (2012) The impact of acute temperature stress on hemocytes of
- 585 invasive and native mussels (*Mytilus galloprovincialis* and *Mytilus californianus*): DNA
- 586 damage, membrane integrity, apoptosis and signaling pathways. *Journal of Experimental*

587        *Biology*, **215**, 4267–4277.  
588  
589



590 **Figures**  
591

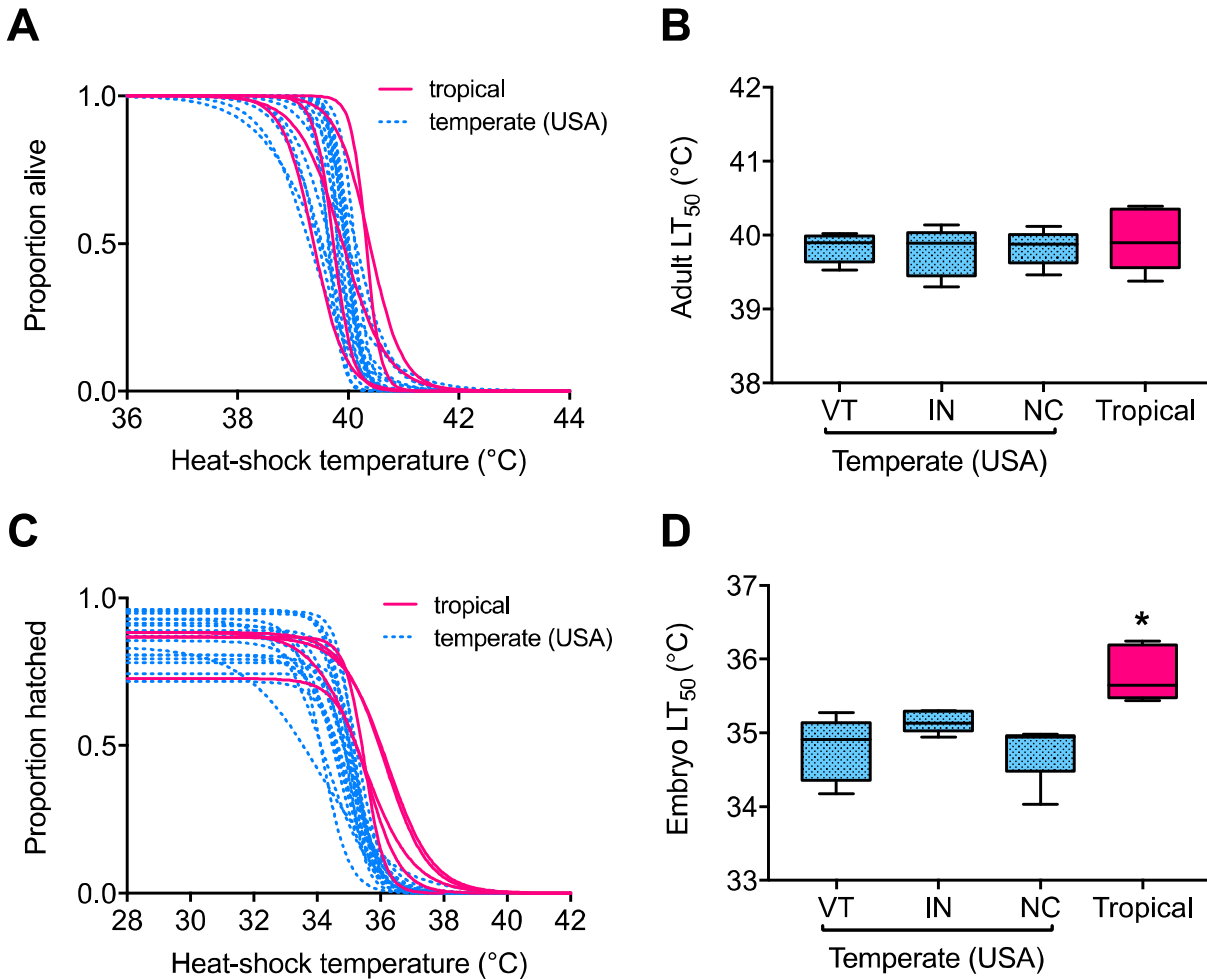

592  
593

**Figure 1.**  
**Flies from different populations around the world exhibited differences in embryonic thermal tolerance but not adult thermal tolerance.**

596 (A) Proportion of adult flies that survived after heat shock (45 min at indicated temperature; see  
597 Methods for rate of temperature change). Tropical lines are indicated in solid pink. Temperate  
598 lines are indicated in dotted blue. (B) Adult  $LT_{50}$  was consistent across all populations (ANOVA,  
599  $F_{3,20} = 0.3134$ ,  $P = 0.8155$ ).  $LT_{50}$  was extrapolated from the survival curves in A. Boxes indicate  
600 upper and lower quartiles, whiskers extend to maximum and minimum values, and horizontal  
601 lines indicate the medians. (C) Proportion of eggs that successfully hatched following heat shock  
602 (45 min at indicated temperature). Tropical lines are indicated in solid pink. Temperate lines are  
603 indicated in dotted blue. (D) Embryonic thermal tolerance ( $LT_{50}$ ) was higher in tropical lines than  
604 temperate lines (ANOVA,  $F_{3,20} = 10.16$ ,  $P = 0.0003$ ; Tukey's test, VT vs. IN,  $q = 2.428$ ,  $P =$   
605  $0.3416$ , VT vs. NC,  $q = 0.4268$ ,  $P = 0.9902$ , IN vs. NC,  $q = 2.666$ ,  $P = 0.2656$ , tropical vs. VT,  $q$   
606  $= 6.909$ ,  $P = 0.0005$ , tropical vs. IN,  $q = 4.04$ ,  $P = 0.0444$ , tropical vs. NC,  $q = 4.04$ ,  $P = 0.0005$ ).  
607  $LT_{50}$  was extrapolated from the survival curves in C. Boxes and whiskers drawn as in B. \* $P <$   
608  $0.05$ .

609

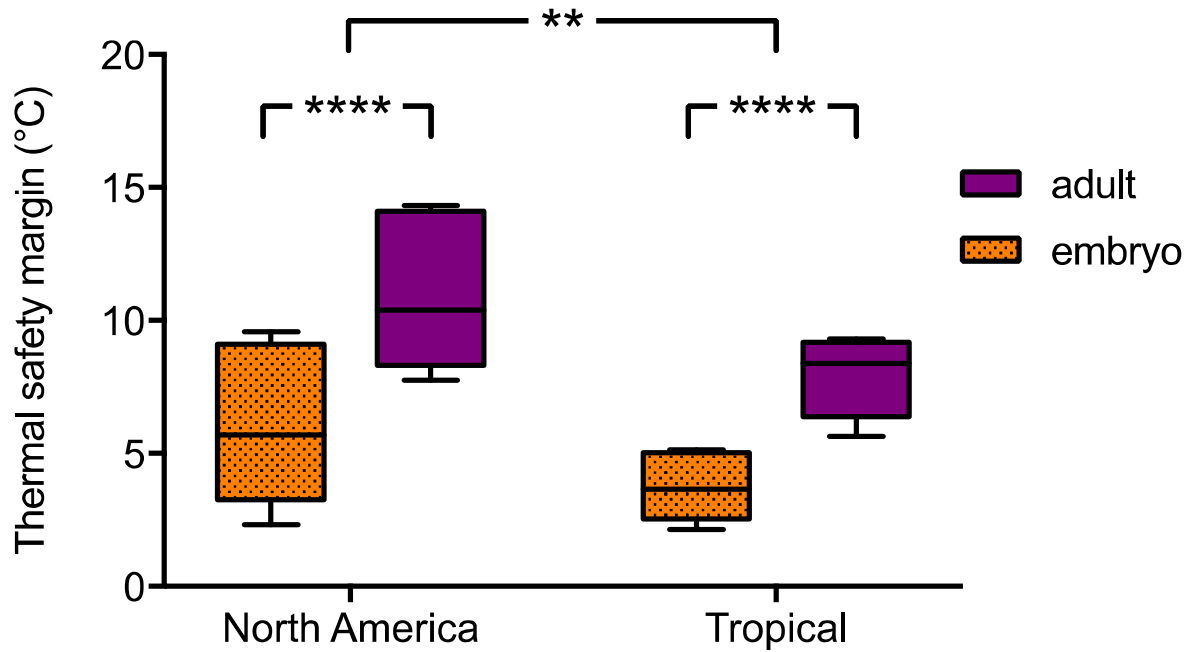

610

611 **Figure 2.**

612 **Thermal safety margin differs by life stage and geographic region.**

613 (A) Thermal safety margins were smaller for embryos than adults and smaller in the tropics than  
614 temperate sites (ANOVA, main effect of life stage,  $F_{1,45} = 26.19$ ,  $P < 0.0001$ , main effect of  
615 region,  $F_{1,45} = 10.58$ ,  $P = 0.0027$ , life stage x region interaction,  $F_{1,45} = 0.1745$ ,  $P = 0.6782$ ).

616 Boxes indicate upper and lower quartiles, whiskers extend to maximum and minimum values,  
617 and horizontal lines indicate the medians. \*\* $P < 0.01$ , \*\*\*\* $P < 0.0001$ .

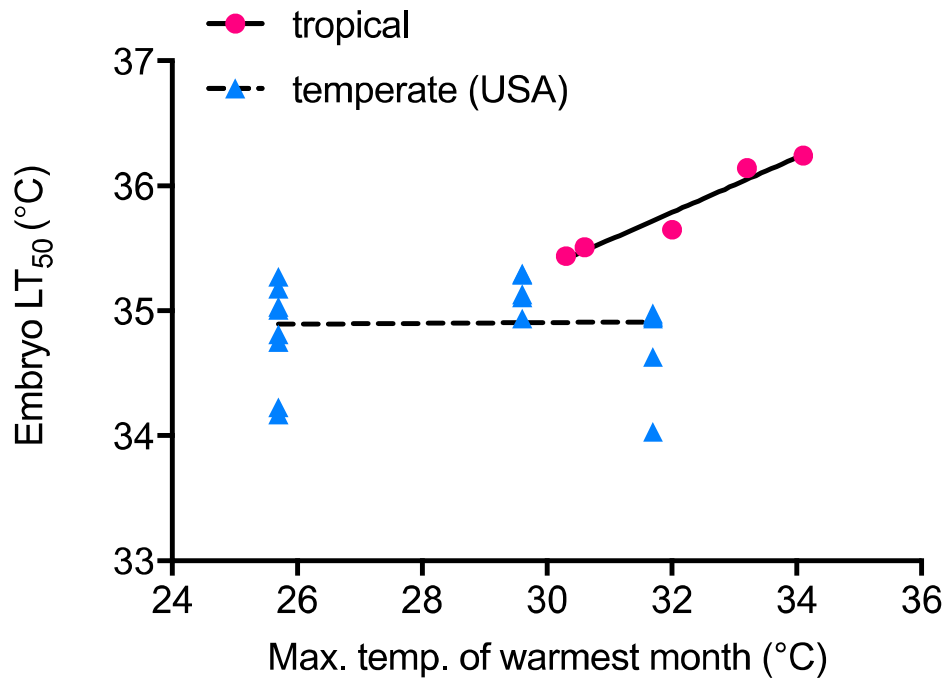

618  
619  
620  
621  
622  
623  
624  
625  
626

**Figure 3.**

**Embryonic thermal tolerance and maximum habitat temperature ( $T_{\max}$ ) by region.**

Embryonic thermal tolerance was positively correlated with  $T_{\max}$  among tropical populations (Least-squares regression,  $R^2 = 0.9478$ ,  $P = 0.0051$ ,  $y = 0.2199x + 28.75$ ) but not temperate populations (Least-squares regression,  $R^2 = 0.0015$ ,  $P = 0.9751$ ,  $y = 0.00282x + 34.82$ ). Tropical genotypes are indicated in pink circles, with a solid black regression line fit. Temperate genotypes are indicated in blue triangles, with a dashed black regression line fit.

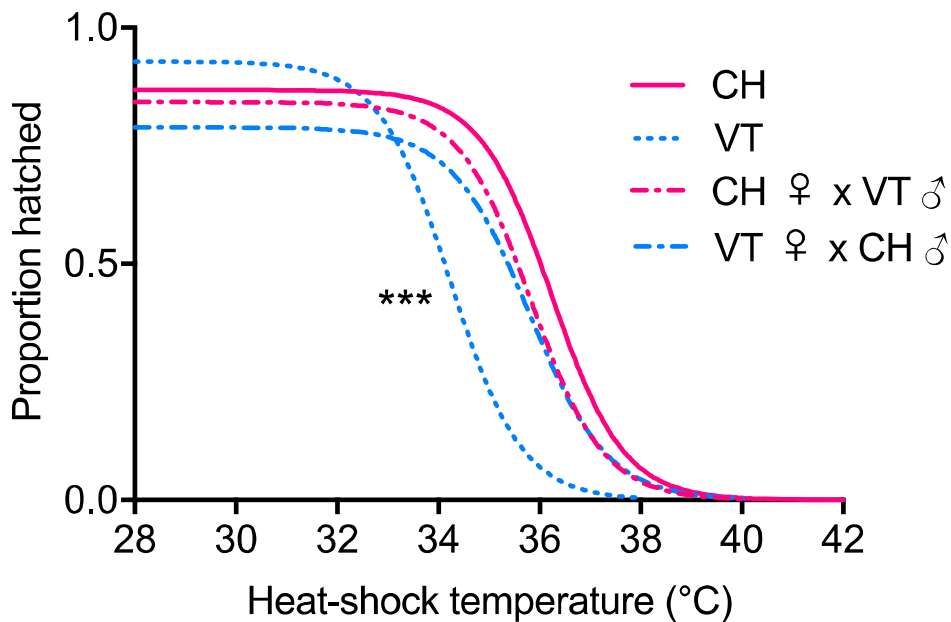

627  
628  
629  
630  
631  
632  
633  
634  
635  
636  
637

**Figure 4.**

**F1 progeny from tropical x temperate parents have high embryonic heat tolerance.**

Proportion of eggs that successfully hatched following heat shock (45 min at indicated temperature) among two parental genotypes that had the highest and lowest embryonic  $LT_{50}$  of all strains in this study, CH (Chiapas, Mexico) and VT-12 (Vermont, USA), respectively, along with F1 progeny from reciprocal crosses of these two parental lines,  $CH_{\text{♀}} \times VT_{\text{♂}}$  and  $VT_{\text{♀}} \times CH_{\text{♂}}$  ( $\text{♀}$  = dam;  $\text{♂}$  = sire). Note that VT-12 is labeled “VT” in the legend.  $LT_{50}$ : CH = 36.24°C, VT-12 = 34.23°C,  $CH_{\text{♀}} \times VT_{\text{♂}}$  = 35.83°C,  $VT_{\text{♀}} \times CH_{\text{♂}}$  = 35.80°C (Logistic model, Extra sum-of-squares F-test on lower  $LT_{50}$  of VT-12,  $F_{3,166} = 6.695$ ,  $***P = 0.0003$ ).

638

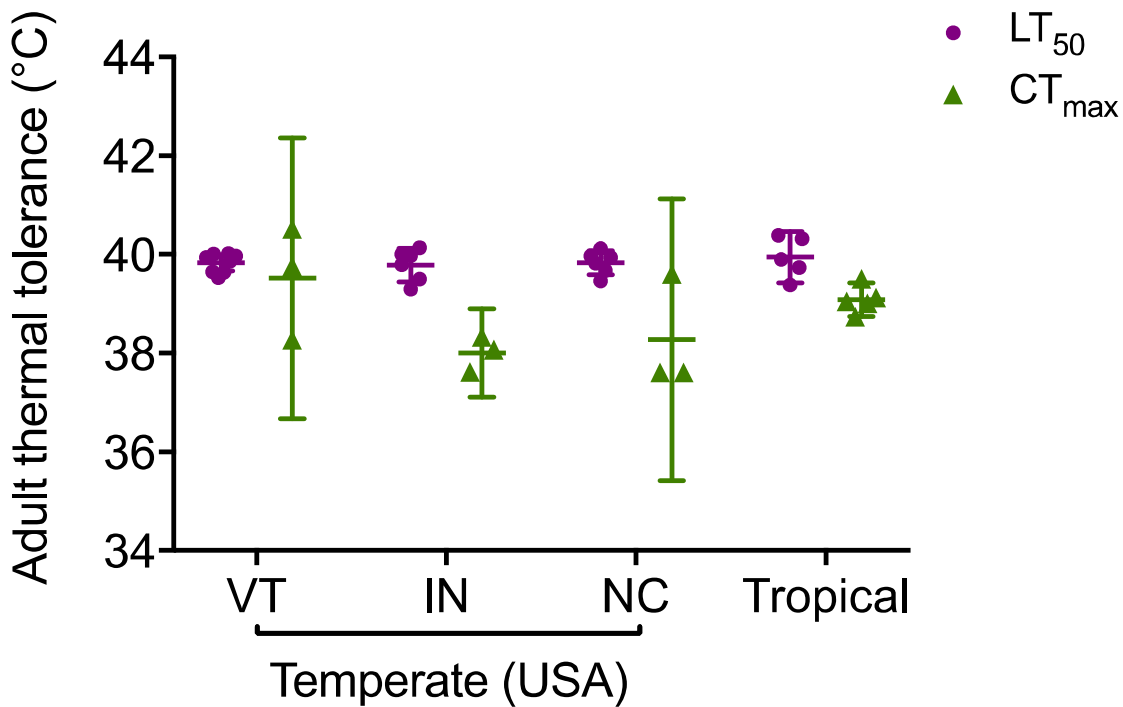

639

640

**Supplemental Figure S1.**

641

**No significant difference in adult thermal tolerance (LT<sub>50</sub> or CT<sub>max</sub>) among North**

642

**American and tropical populations.** There were no significant differences among collection

643

sites in adult thermal tolerance as measured by LT<sub>50</sub> (ANOVA,  $F_{3,20} = 0.3134$ ,  $P = 0.8155$ ) or

644

CT<sub>max</sub> (ANOVA,  $F_{3,9} = 2.378$ ,  $P = 0.1375$ ). Overall, adult CT<sub>max</sub> values were lower than LT<sub>50</sub>

645

values across all sites (ANOVA,  $F_{1,31} = 44.73$ ,  $P < 0.0001$ ). Each point represents LT<sub>50</sub> or CT<sub>max</sub>

646

for a single isofemale line. Error bars represent 95% confidence intervals and horizontal lines

647

represent means among isofemale lines in each group.

648

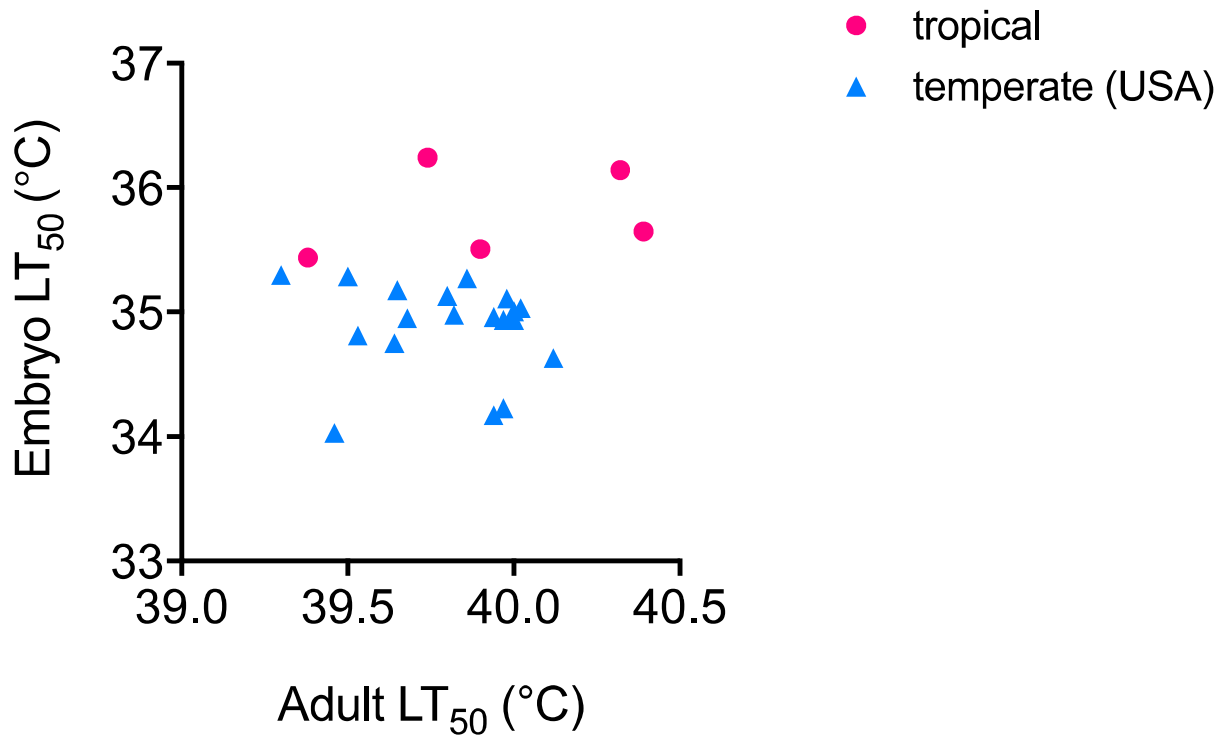

649

650

651 **Supplemental Figure S2.**

652 **No significant relationship between adult and embryo thermal tolerance.**

653 Adult thermal tolerance and embryonic thermal tolerance were not correlated for either  
654 temperate (Least-squares linear regression,  $R^2 = 0.015$ ,  $y = -0.1973x + 42.73$ ) or tropical lines  
655 (Least-squares linear regression,  $R^2 = 0.09$ ,  $y = 0.2664x + 25.15$ ). Tropical isofemale lines are  
656 shown in pink circles and temperate isofemale lines are shown in blue triangles.

657

658

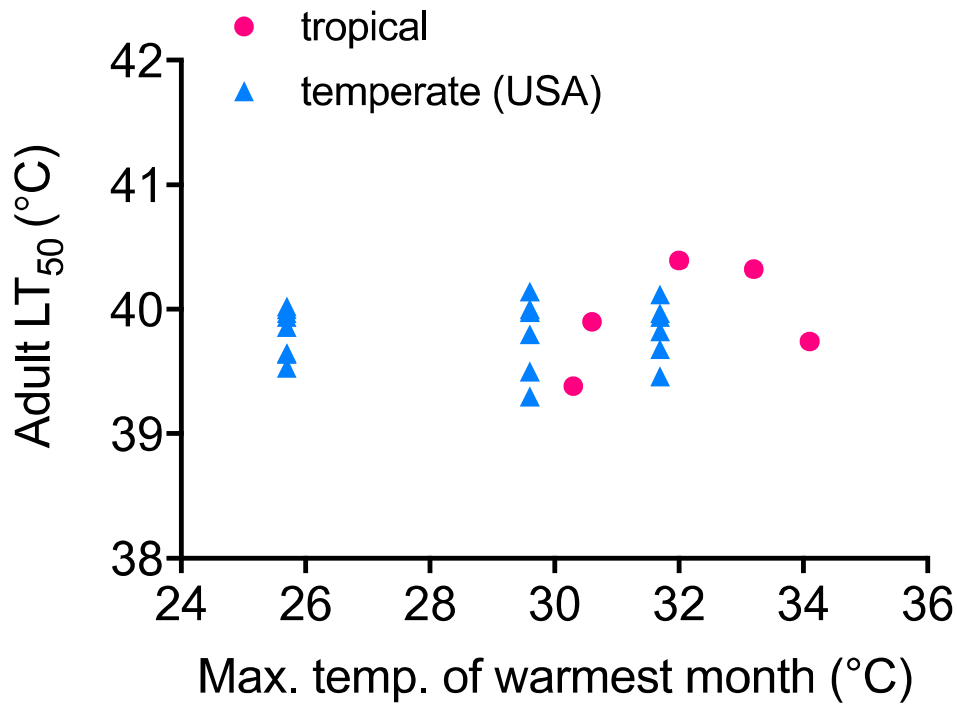

659

660

661 **Supplemental Figure S3.**

662 **No significant relationship between adult thermal tolerance (LT<sub>50</sub>) and maximum habitat**  
663 **temperature (T<sub>max</sub>).**

664 Variation in adult thermal tolerance showed no significant correspondence to variation in T<sub>max</sub> in  
665 either temperate (Least-squares linear regression,  $R^2 = 0.004$ ,  $y = -0.0005x + 39.83$ ) or tropical  
666 regions (Least-squares linear regression,  $R^2 = 0.14$ ,  $y = 0.098x + 36.82$ ). Tropical isofemale lines  
667 are shown in pink circles and temperate isofemale lines are shown in blue triangles.

668

669 **Tables**

670

671 **Table 1.** Collection site locations, regions, climate zones, and maximum habitat temperatures of  
672 the warmest month of the year ( $T_{\max}$ ) from 1950-2000 (WorldClim; Hijmans *et al.* 2005).  
673

| Collection Locale                     | Lat. (°N) | Long. (°E) | Region          | Climate Zone    | $T_{\max}$ (°C) |
|---------------------------------------|-----------|------------|-----------------|-----------------|-----------------|
| East Calais, Vermont, USA (VT)        | 44.4      | -72.4      | North America   | North Temperate | 25.7            |
| Beasley Orchard, Indiana, USA (IN)    | 39.8      | -86.5      | North America   | North Temperate | 29.6            |
| Raleigh, North Carolina, USA (NC)     | 35.8      | -78.7      | North America   | North Temperate | 31.7            |
| Chiapa de Corzo, Chiapas, Mexico (CH) | 16.7      | -93.0      | Central America | Tropics         | 34.1            |
| Monkey Hill, St. Kitts (SK)           | 17.3      | -62.7      | Caribbean       | Tropics         | 30.3            |
| Accra, Ghana (GH)                     | 5.6       | -0.2       | West Africa     | Tropics         | 32.0            |
| Mumbai, India (MU)                    | 19.1      | 72.9       | Western India   | Tropics         | 33.2            |
| Guam, USA (GU)                        | 13.4      | 144.8      | Oceania         | Tropics         | 30.6            |

674

675

676



677 **Supplemental Table S1.**  
 678 Stock information, collection locale, year collected, and thermal tolerance data for isofemale  
 679 lines used in this study.  
 680

| Stock No.      | Locale          | State/Country       | Year | Lat. (°N) | Long. (°E) | Adult LT <sub>50</sub> (°C) | Embryo LT <sub>50</sub> (°C) |
|----------------|-----------------|---------------------|------|-----------|------------|-----------------------------|------------------------------|
| VTECK_2        | East Calais     | Vermont, USA        | 2011 | 44.37     | -72.43     | 39.65                       | 35.18                        |
| VTECK_4        | East Calais     | Vermont, USA        | 2011 | 44.37     | -72.43     | 40.02                       | 35.03                        |
| VTECK_5        | East Calais     | Vermont, USA        | 2011 | 44.37     | -72.43     | 39.64                       | 34.75                        |
| VTECK_8        | East Calais     | Vermont, USA        | 2011 | 44.37     | -72.43     | 39.53                       | 34.81                        |
| VTECK_9        | East Calais     | Vermont, USA        | 2011 | 44.37     | -72.43     | 39.86                       | 35.27                        |
| VTECK_10       | East Calais     | Vermont, USA        | 2011 | 44.37     | -72.43     | 39.94                       | 34.17                        |
| VTECK_12       | East Calais     | Vermont, USA        | 2011 | 44.37     | -72.43     | 39.97                       | 34.23                        |
| VTECK_14       | East Calais     | Vermont, USA        | 2011 | 44.37     | -72.43     | 40.00                       | 35.01                        |
| BEA_5          | Beasley Orchard | Indiana, USA        | 2011 | 39.76     | -86.48     | 39.80                       | 35.13                        |
| BEA_16         | Beasley Orchard | Indiana, USA        | 2011 | 39.76     | -86.48     | 39.98                       | 35.11                        |
| BEA_17         | Beasley Orchard | Indiana, USA        | 2011 | 39.76     | -86.48     | 40.14                       | -                            |
| BEA_21         | Beasley Orchard | Indiana, USA        | 2011 | 39.76     | -86.48     | 40.00                       | 34.94                        |
| BEA_32         | Beasley Orchard | Indiana, USA        | 2011 | 39.76     | -86.48     | 39.30                       | 35.30                        |
| BEA_36         | Beasley Orchard | Indiana, USA        | 2011 | 39.76     | -86.48     | 39.50                       | 35.29                        |
| RFM_4          | Raleigh         | North Carolina, USA | 2011 | 35.76     | -78.66     | 39.82                       | 34.98                        |
| RFM_6          | Raleigh         | North Carolina, USA | 2011 | 35.76     | -78.66     | 39.68                       | 34.95                        |
| RFM_16         | Raleigh         | North Carolina, USA | 2011 | 35.76     | -78.66     | 39.46                       | 34.03                        |
| RFM_19         | Raleigh         | North Carolina, USA | 2011 | 35.76     | -78.66     | 40.12                       | 34.63                        |
| RFM_34         | Raleigh         | North Carolina, USA | 2011 | 35.76     | -78.66     | 39.94                       | 34.96                        |
| RFM_48         | Raleigh         | North Carolina, USA | 2011 | 35.76     | -78.66     | 39.97                       | 34.94                        |
| 14021-0231.22  | Chiapa de Corzo | Chiapas, Mexico     | 2002 | 16.70     | -93.01     | 39.74                       | 36.24                        |
| 14021-0231.34  | Monkey Hill     | St. Kitts           | 2005 | 17.32     | -62.73     | 39.38                       | 35.44                        |
| 14021-0231.182 | Accra           | Ghana               | 2010 | 5.56      | -0.20      | 40.39                       | 35.65                        |
| 14021-0231.45  | Mumbai          | Maharashtra, India  | 2006 | 19.08     | 72.88      | 40.32                       | 36.14                        |
| 14021-0231.198 | Guam            | Guam, USA           | 2012 | 13.44     | 144.79     | 39.90                       | 35.51                        |

681
